# Supplementary material
Source: PubMed Central journal article supplement (PMC2268774)

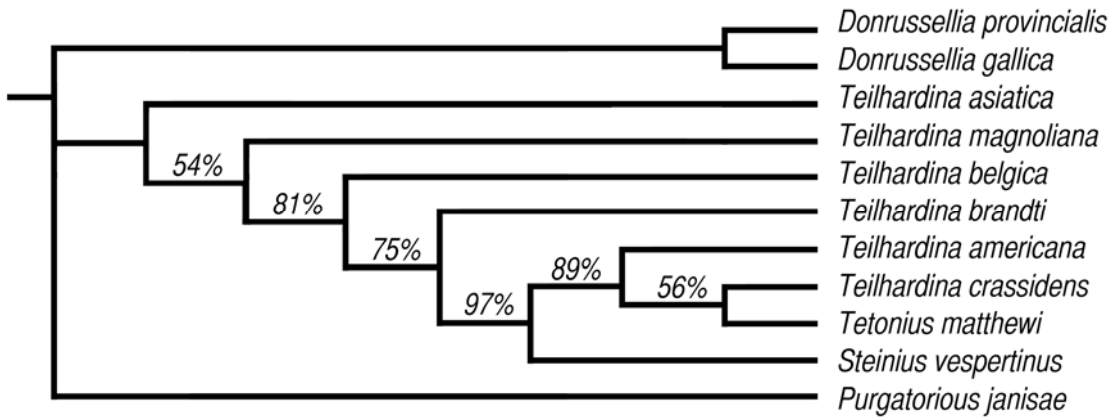

Supplement: pnas_0710180105_1.pdf [file pnas_0710180105_1.pdf]

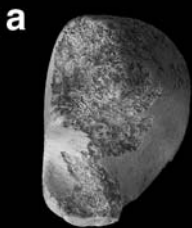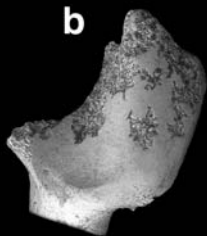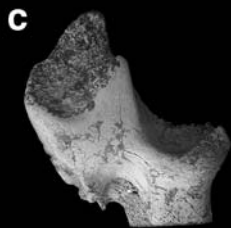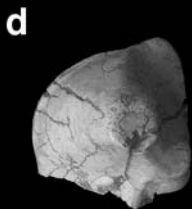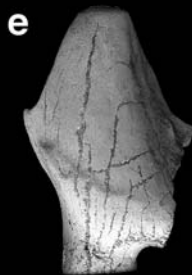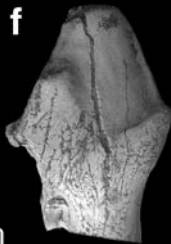

1 mm

A horizontal white line representing a scale bar, located below the text '1 mm'.

Supplement: pnas_0710180105_2.pdf [file pnas_0710180105_2.pdf]

**a**

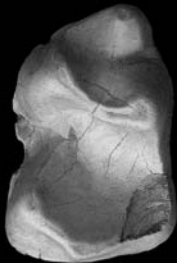

**b**

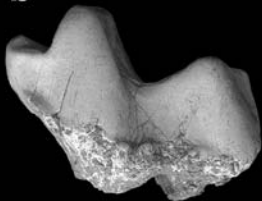

**c**

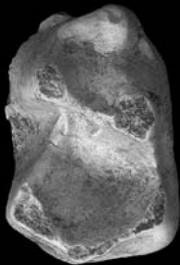

**d**

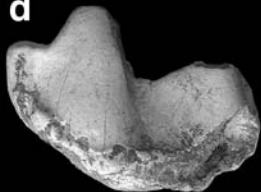

1 mm

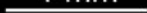

Supplement: pnas_0710180105_3.pdf [file pnas_0710180105_3.pdf]

**a**

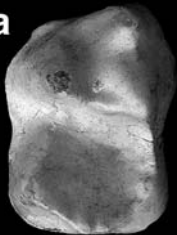

**b**

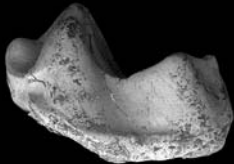

1 mm

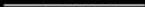

Supplement: pnas_0710180105_4.pdf [file pnas_0710180105_4.pdf]

**a**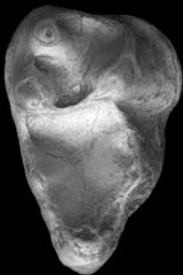**b**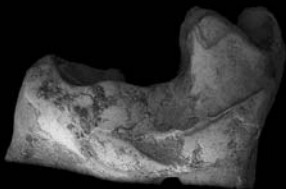**c**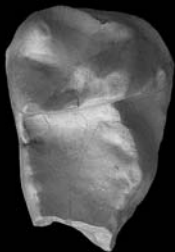**d**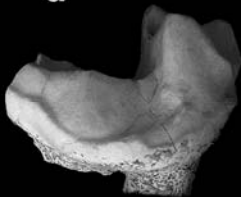**e**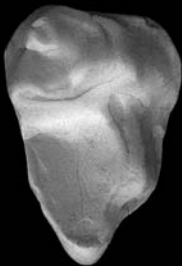**f**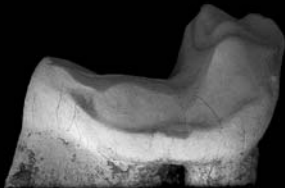

1 mm

---

Supplement: pnas_0710180105_5.pdf [file pnas_0710180105_5.pdf]

**a**

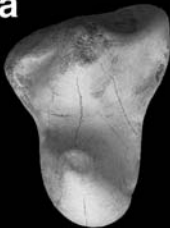

**b**

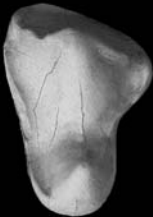

1 mm

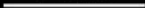

Supplement: pnas_0710180105_6.pdf [file pnas_0710180105_6.pdf]

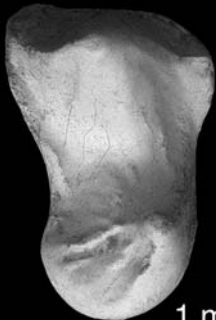

1 mm

Supplement: pnas_0710180105_7.pdf [file pnas_0710180105_7.pdf]

**a**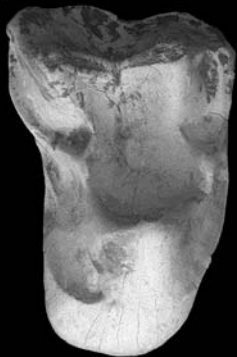**b**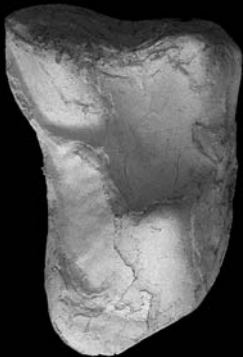**c**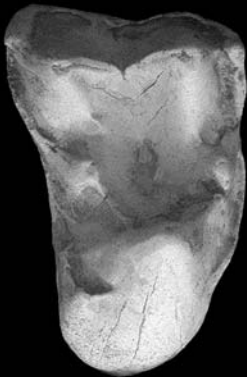

1 mm

---

Supplement: pnas_0710180105_8.pdf [file pnas_0710180105_8.pdf]

**a**

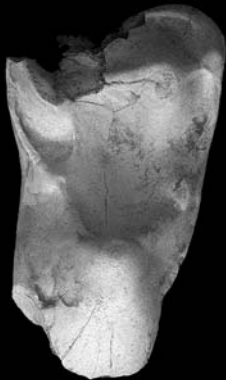

**b**

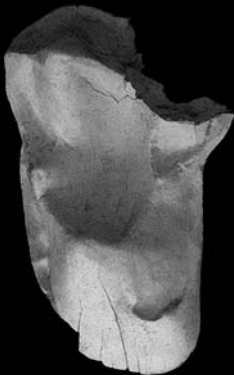

**c**

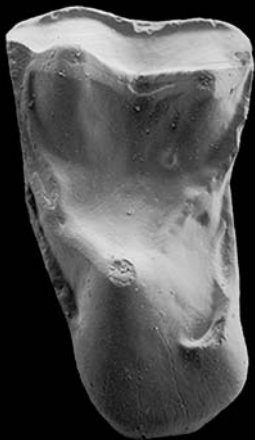

**1 mm**

---

Supplement: pnas_0710180105_9.pdf [file pnas_0710180105_9.pdf]
